# Supplementary material for: The Role of Intraventricular Hemorrhage in Traumatic Brain Injury: A Novel Scoring System
Source: MDPI journal article supplement (doi:10.3390/jcm11082127), 2022-04-11
Supplement: s1 [file s1]

**Supplementary Table S4. Poor functional outcomes in different Traumatic Graeb Score**

| Traumatic Graeb Score | N  | Poor functional outcomes (%) |
|-----------------------|----|------------------------------|
| 1                     | 14 | 7.1                          |
| 2                     | 27 | 7.4                          |
| 3                     | 25 | 52                           |
| 4                     | 27 | 66.7                         |
| 5                     | 11 | 90.9                         |
| 6                     | 11 | 72.7                         |
| 7                     | 4  | 100                          |
| 8                     | 9  | 100                          |
| 9                     | 7  | 85.7                         |
| 10                    | 8  | 100                          |
| 11                    | 3  | 100                          |
| 12                    | 1  | 100                          |
| 13                    | 1  | 100                          |
| 14                    | 1  | 100                          |
