# Supplementary material for: The Role of Intraventricular Hemorrhage in Traumatic Brain Injury: A Novel Scoring System
Source: MDPI journal article supplement (doi:10.3390/jcm11082127), 2022-04-11
Supplement: s1 [file s1]

**Supplementary Table S3. Traumatic Graeb score and outcomes of IVH in different ventricles AUC (95% CI)**

| Outcomes / score                           | AUC (95% CI)           | <i>P</i> | Cut-point | Sensitivity (95%CI) | Specificity (95%CI) |
|--------------------------------------------|------------------------|----------|-----------|---------------------|---------------------|
| In-hospital Mortality                      |                        |          |           |                     |                     |
| All ( <i>n</i> = 149)                      | 0.888<br>(0.826–0.934) | <0.001   | >5        | 81.58 (65.7–92.3)   | 83.78 (75.6–90.1)   |
| Lateral ventricle ( <i>n</i> = 136)        | 0.888<br>(0.822–0.935) | <0.001   | >5        | 83.33 (67.2–93.6)   | 82.18 (73.3–89.1)   |
| 3 <sup>rd</sup> ventricle ( <i>n</i> = 51) | 0.865<br>(0.740–0.944) | <0.001   | >7        | 84.00 (63.9–95.5)   | 73.08 (52.2–88.4)   |
| 4 <sup>th</sup> ventricle ( <i>n</i> = 59) | 0.898<br>(0.791–0.961) | <0.001   | >7        | 84.00 (63.9–95.5)   | 79.41 (62.1–91.3)   |
| Poor outcomes at discharge (mRS > 2)       |                        |          |           |                     |                     |
| All ( <i>n</i> = 149)                      | 0.880<br>(0.817–0.928) | <0.001   | >3        | 88.24 (79.4–94.2)   | 73.44 (60.9–83.7)   |
| Lateral ventricle ( <i>n</i> = 136)        | 0.865<br>(0.796–0.917) | <0.001   | >3        | 87.80 (78.7–94.0)   | 69.09 (55.2–80.9)   |
| 3 <sup>rd</sup> ventricle ( <i>n</i> = 51) | 0.857<br>(0.730–0.939) | <0.001   | >7        | 67.50 (50.9–81.4)   | 90.91 (58.7–99.8)   |
| 4 <sup>th</sup> ventricle ( <i>n</i> = 59) | 0.891<br>(0.783–0.957) | <0.001   | >6        | 71.43 (55.4–84.3)   | 88.24 (63.6–98.5)   |

Abbreviations: IVH, intraventricular hemorrhage; AUC: area under the curve; CI: confidence interval; mRS: modified Rankin Scale
