# Supplementary material for: The Role of Intraventricular Hemorrhage in Traumatic Brain Injury: A Novel Scoring System
Source: MDPI journal article supplement (doi:10.3390/jcm11082127), 2022-04-11
Supplement: s1 [file s1]

**Supplementary Table S2.  $\Delta$ AUC values of different models in predicting outcomes**

| Outcomes / score                     | $\Delta$ AUC, % (95% CI) | <i>P</i> |
|--------------------------------------|--------------------------|----------|
| In-hospital Mortality                |                          |          |
| <b>Traumatic Graeb score†</b>        | Reference                | -        |
| The Graeb score*                     | 4.09 (0.82–7.36)         | 0.014    |
| The LeRoux score*                    | 5.44 (0.63–8.19)         | 0.022    |
| IVH score*                           | 6.03 (0.31–11.80)        | 0.039    |
| <b>Traumatic LeRoux score</b>        | Reference                | -        |
| The Graeb score                      | 3.27 (-0.43–6.97)        | 0.083    |
| The LeRoux score*                    | 3.59 (0.74–6.44)         | 0.014    |
| IVH score                            | 5.22 (-1.45–11.90)       | 0.125    |
| <b>Traumatic IVH score</b>           | Reference                | -        |
| The Graeb score                      | 0.89 (-4.03–5.81)        | 0.723    |
| The LeRoux score                     | 1.21 (-5.21–7.63)        | 0.712    |
| IVH score*                           | 2.83 (0.69–4.98)         | 0.001    |
| Poor outcomes at discharge (mRS > 2) |                          |          |
| <b>Traumatic Graeb score†</b>        | Reference                | -        |
| The Graeb score*                     | 5.97 (2.84–9.11)         | <0.001   |
| The LeRoux score*                    | 8.84 (4.68–13.00)        | <0.0001  |
| IVH score*                           | 6.71 (1.65–11.80)        | 0.009    |
| <b>Traumatic LeRoux score</b>        | Reference                | -        |
| The Graeb score                      | 3.12 (-0.27–6.52)        | 0.071    |
| The LeRoux score*                    | 5.99 (3.13–8.85)         | <0.001   |
| IVH score                            | 3.86 (-1.81–9.53)        | 0.182    |
| <b>Traumatic IVH score</b>           | Reference                | -        |
| The Graeb score                      | 4.06 (-0.66–8.79)        | 0.092    |
| The LeRoux score*                    | 6.93 (1.16–12.70)        | 0.019    |
| IVH score*                           | 4.80 (2.62–6.98)         | <0.001   |

Abbreviations: IVH, intraventricular hemorrhage; AUC: area under the curve; CI: confidence interval; mRS, modified Rankin Scale

†: The only score that surpassed all three existing IVH grading scales in predicting outcomes.

\*:  $\Delta$ AUC that was statistically significant.
