# Supplementary material for: The Role of Intraventricular Hemorrhage in Traumatic Brain Injury: A Novel Scoring System
Source: MDPI journal article supplement (doi:10.3390/jcm11082127), 2022-04-11
Supplement: s1 [file s1]

**Supplementary Table S1. Types of IVH grading scale and outcomes AUC (95% CI)**

| Outcomes / score                                   | AUC<br>(95% CI)        | <i>P</i> | Cut-<br>point | Sensitivity<br>(95%CI) | Specificity<br>(95%CI) |
|----------------------------------------------------|------------------------|----------|---------------|------------------------|------------------------|
| <b>In-hospital Mortality<br/>(<i>n</i> = 149)</b>  |                        |          |               |                        |                        |
| The Graeb score                                    | 0.847<br>(0.779–0.901) | <0.001   | >5            | 65.79<br>(48.6-80.4)   | 91.89<br>(85.2-96.2)   |
| The LeRoux score                                   | 0.844<br>(0.775–0.898) | <0.001   | >6            | 68.42<br>(51.3-82.5)   | 87.39<br>(79.7-92.9)   |
| IVH score                                          | 0.828<br>(0.757–0.885) | <0.001   | >10           | 68.42<br>(51.3-82.5)   | 88.29<br>(80.8-93.6)   |
| Traumatic Graeb score                              | 0.888<br>(0.826–0.934) | <0.001   | >5            | 81.58<br>(65.7-92.3)   | 83.78<br>(75.6-90.1)   |
| Traumatic LeRoux<br>score                          | 0.880<br>(0.817–0.927) | <0.001   | >5            | 84.21<br>(68.7-94.0)   | 77.48<br>(68.6-84.9)   |
| Traumatic IVH score                                | 0.856<br>(0.789–0.908) | <0.001   | >10           | 76.32<br>(59.8-88.6)   | 82.88<br>(74.6-89.4)   |
| <b>Poor outcomes at<br/>discharge (mRS &gt; 2)</b> |                        |          |               |                        |                        |
| The Graeb score*                                   | 0.821<br>(0.750–0.879) | <0.001   | >2            | 75.29<br>(64.7-84.0)   | 76.56<br>(64.3-86.2)   |
| The LeRoux score*                                  | 0.793<br>(0.718–0.854) | <0.001   | >2            | 76.47<br>(66.0-85.0)   | 70.31<br>(57.6-81.1)   |
| IVH score                                          | 0.813<br>(0.741–0.872) | <0.001   | >5            | 85.88<br>(76.6-92.5)   | 59.38<br>(46.4-71.5)   |
| Traumatic Graeb score                              | 0.880<br>(0.817–0.928) | <0.001   | >3            | 88.24<br>(79.4-94.2)   | 73.44<br>(60.9-83.7)   |
| Traumatic LeRoux<br>Score                          | 0.852<br>(0.785–0.905) | <0.001   | >3            | 88.24<br>(79.4-94.2)   | 68.75<br>(55.9-79.8)   |
| Traumatic IVH score                                | 0.861<br>(0.795–0.912) | <0.001   | >7            | 80.00 (69.9-<br>87.9)  | 81.25 (69.5-<br>89.9)  |

Abbreviations: IVH, intraventricular hemorrhage; AUC: area under the curve; CI: confidence interval; mRS, modified Rankin Scale

\*: The Graeb score was significantly more accurate than the LeRoux score in predicting poor outcomes
